# Supplementary material
Source: Springer Nature journal article supplement (https://www.springermedizin.de/resource/supplementary/12905_2013_384_MOESM2_ESM.pdf/9518648)
Supplement: MOESM2 [file 9518648]

## **Familiarization with text/interview content**

Reading of transcriptions and listening to audio recordings to capture the emotions

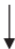

## **Meaning analysis**

Coding according to the findings from the quantitative analysis

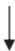

## **Organization of data**

Main themes and categories from the qualitative data were organized and reviewed in a framework to interpret the meaning of each of the 16 women's expressions

### *1. Women's experiences due to UP*

1.1. Physical discomfort

1.2. Sexual discomfort

### *2. Emotional stress*

2.1. Spousal behavior after disclosure of UP

2.2. Domestic violence after disclosure of UP

### *3. Perceived cause of UP*

3.1. Past experiences of work load in postnatal period

3.2. Past experiences of obstetric complications

### *4. Care-seeking practices for UP*

4.1. Type of practices

4.2. How coping with the problem

4.3. Reasons for delay in seeking health care
